# Supplementary material
Source: MDPI journal article supplement (https://www.mdpi.com/2071-1050/12/2/692)
Supplement: s1 [file s1]

### Guide to the supplementary material:

| Workshop posters                                                                    | Translation                                                                                                                                                                                                                                                                                                                                                                                                                                                                          |
|-------------------------------------------------------------------------------------|--------------------------------------------------------------------------------------------------------------------------------------------------------------------------------------------------------------------------------------------------------------------------------------------------------------------------------------------------------------------------------------------------------------------------------------------------------------------------------------|
| 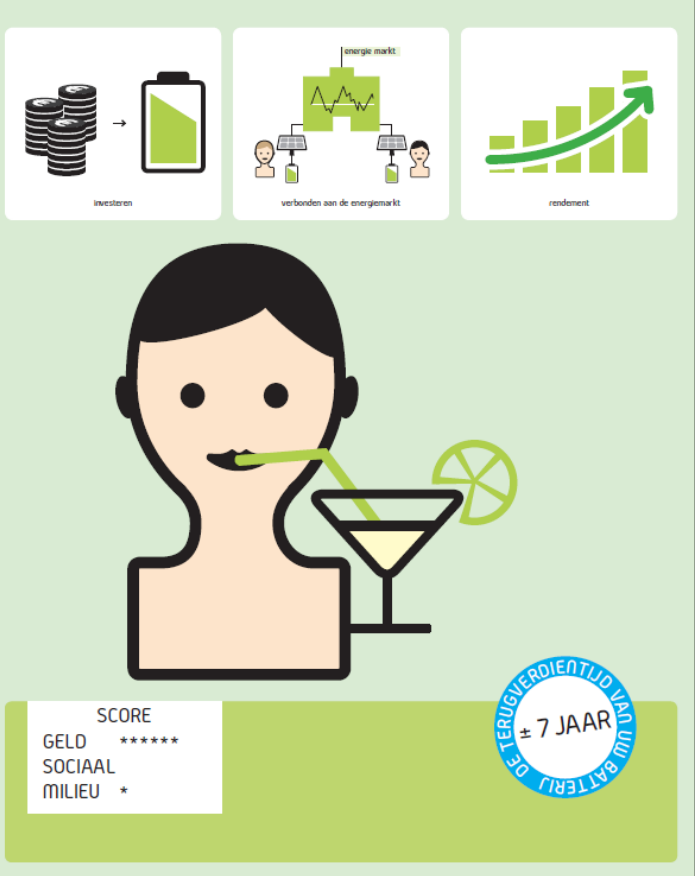  | <p><b>Visualisation of platform outcome A1: commercial energy platform</b></p> <p><u>Key aspects:</u></p> <ol style="list-style-type: none"> <li>1. Investing in battery technology</li> <li>2. Connected to energy markets</li> <li>3. Profitability</li> </ol> <p><u>Score:</u></p> <p>Money: *****</p> <p>Social: *</p> <p>Environment: *</p> <p>Return on investment: 7 years</p>                                                                                                |
|  | <p><b>Visualisation of platform outcome A2: commercial energy platform</b></p> <p><u>Key aspects:</u></p> <ol style="list-style-type: none"> <li>1. Connected to energy markets</li> <li>2. Battery employed for broader objective</li> <li>3. Social</li> </ol> <p>(Depicted: a local supermarket, bakery, and butcher under the banner 'local economy')</p> <p><u>Score:</u></p> <p>Money: ****</p> <p>Social: ****</p> <p>Environment: *</p> <p>Return on investment: 7 years</p> |

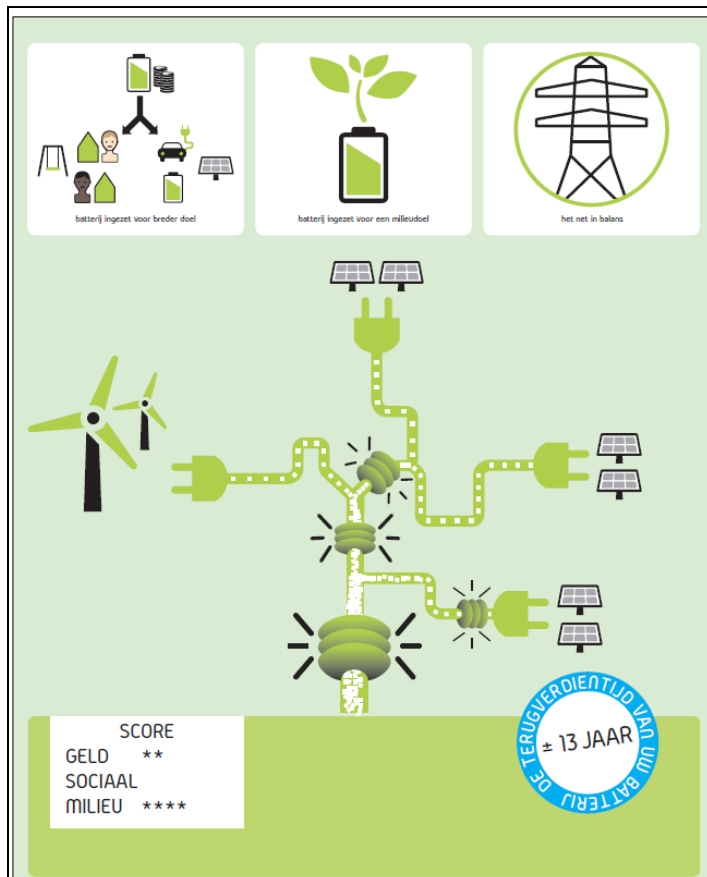

### Visualisation of platform outcome B1: balancing platform

#### Key aspects:

1. Battery employed for broader objective
2. Battery employed for environmental objective
3. Balancing the grid

#### Score:

Money: \*\*

Social: \*\*

Environment: \*\*\*\*

Return on investment: 13 years

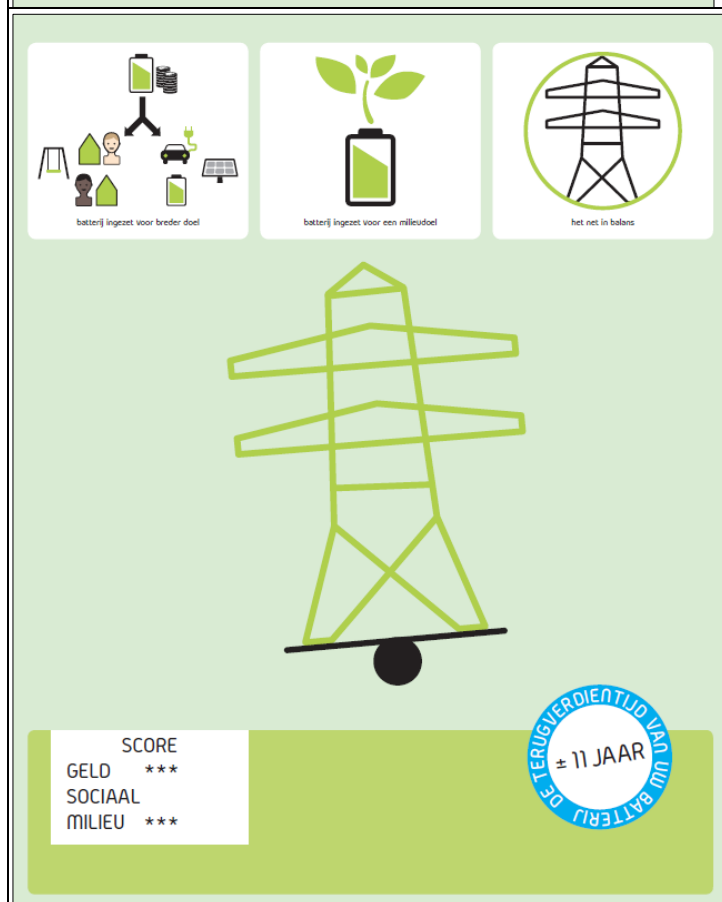

### Visualisation of platform outcome B2: balancing platform

#### Key aspects:

1. Battery employed for broader objective
2. Battery employed for environmental objective
3. Balancing the grid

#### Score:

Money: \*\*\*

Social: \*\*\*

Environment: \*\*\*

Return on investment: 11 years

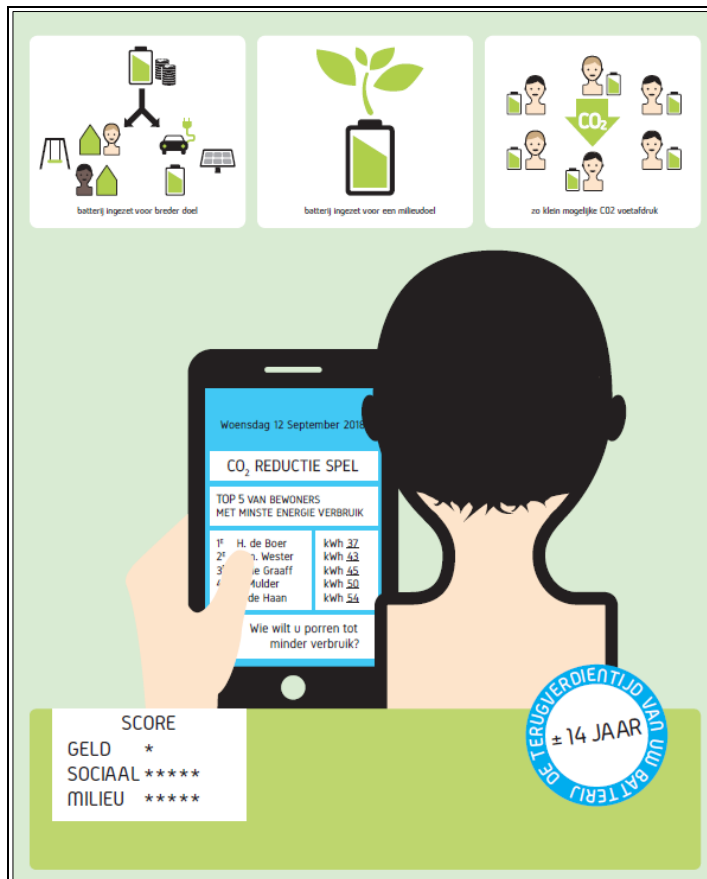

### Visualisation of platform outcome C1: climate platform

#### Key aspects:

1. Battery employed for broader objective
2. Battery employed for environmental objective
3. Minimizing the CO<sub>2</sub>-footprint

(Depicted: a smartphone app 'CO<sub>2</sub> reduction game', showing a fictitious top 5 of low-energy-users. At the bottom it reads: "Who do you want to nudge to consume less?")

#### Score:

Money: \*

Social: \*\*\*\*\*

Environment: \*\*\*\*\*

Return on investment: 14 years

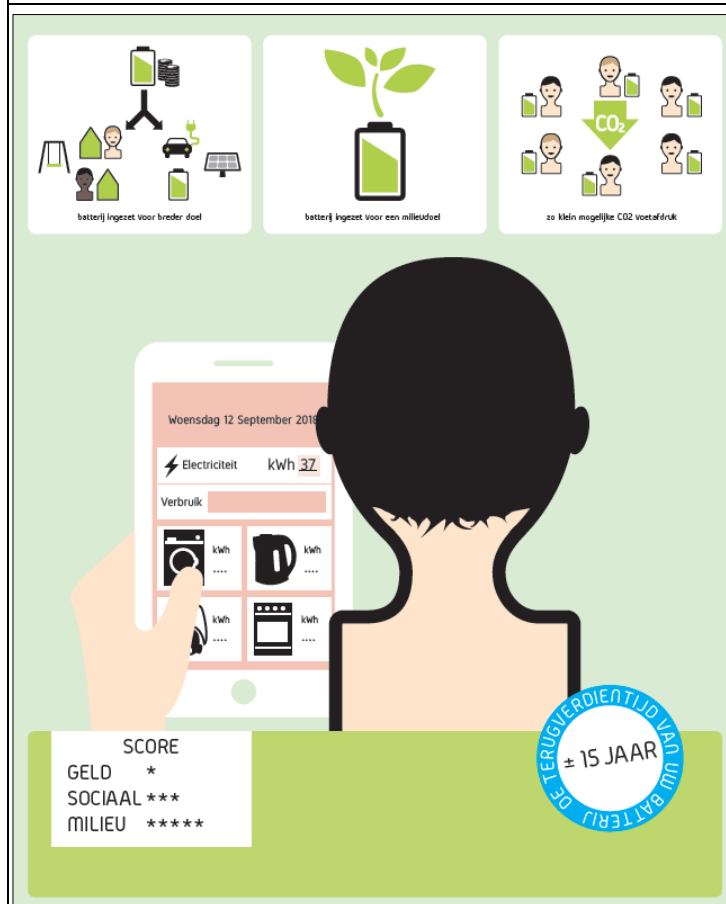

### Visualisation of platform outcome C2: climate platform

#### Key aspects:

1. Battery employed for broader objective
2. Battery employed for environmental objective
3. Minimizing the CO<sub>2</sub>-footprint

(Depicted: a smartphone app showing energy use per appliance.)

#### Score:

Money: \*

Social: \*\*\*

Environment: \*\*\*\*\*

Return on investment: 15 years

| Challenge                                                                                                                                                                                                                                                                                                                                                                                                                                                                                                                                                                                                                                                                                                                                                                                                  | Translation                                                                                                                                                                                                                                                                                                                                                                                                                                                                                                                                                                                                                                                                                                                                                                                                                                                       |
|------------------------------------------------------------------------------------------------------------------------------------------------------------------------------------------------------------------------------------------------------------------------------------------------------------------------------------------------------------------------------------------------------------------------------------------------------------------------------------------------------------------------------------------------------------------------------------------------------------------------------------------------------------------------------------------------------------------------------------------------------------------------------------------------------------|-------------------------------------------------------------------------------------------------------------------------------------------------------------------------------------------------------------------------------------------------------------------------------------------------------------------------------------------------------------------------------------------------------------------------------------------------------------------------------------------------------------------------------------------------------------------------------------------------------------------------------------------------------------------------------------------------------------------------------------------------------------------------------------------------------------------------------------------------------------------|
| <p><b>DIVERSE DEELNEMERS</b></p> 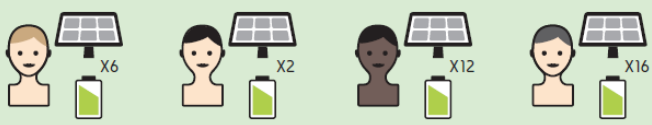 <p><b>REGELS COLLECTIEVE POT</b></p> <p>1. DOELSTELLINGEN - WAARVOOR INZETTEN?</p> <ul style="list-style-type: none"> <li>A. Investeren in energie: opwek, infrastructuur</li> <li>B. Investeren gedeelde buurtvoorzieningen</li> <li>C. Hervredelen winst onder leden</li> <li>D. Anders, namelijk:</li> </ul> <p>2. HOEVEEL % VAN DE WINST IN DE COLLECTIEVE POT? 🌱</p>                                                                                                                                                                                                                             | <p><b>Challenge 1: 'Rules for a collective pot (of money)' in the context of the commercial platforms</b></p> <p>1. Objectives – which purposes?</p> <ul style="list-style-type: none"> <li>A. Investing in energy: generation, infrastructure</li> <li>B. Investing in shared neighbourhood facilities</li> <li>C. Reallocation of profits among members</li> <li>D. Other:</li> </ul> <p>2. How much % of the profits in the collective pot?</p>                                                                                                                                                                                                                                                                                                                                                                                                                |
| <p><b>BEWONERS</b></p>  <p><b>GROENE START-UP:</b></p> <ul style="list-style-type: none"> <li>• Kleinschalig en flexibel</li> <li>• Commercieel</li> <li>• Relatief onbewezen</li> </ul> <p><b>NETBEHEERDER:</b></p> <ul style="list-style-type: none"> <li>• Niet commercieel</li> <li>• Veel kennis in huis</li> <li>• Onbewezen als dienstverlener</li> </ul> <p><b>ENERGIE-COÖPERATIE:</b></p> <ul style="list-style-type: none"> <li>• Weinig kennis in huis</li> <li>• Flexibel</li> <li>• Doelstelling en strategie zelf bepaald</li> </ul> <p><b>ENERGIEBEDRIJF:</b></p> <ul style="list-style-type: none"> <li>• Commercieel</li> <li>• Veel kennis in huis, betrouwbaar</li> <li>• Weinig flexibel</li> </ul> | <p><b>Challenge 2: 'Trust &amp; intermediaries' in the context of balancing platforms</b></p> <p>From top to bottom:</p> <ul style="list-style-type: none"> <li>Residents</li> <li>Grid-balancing services</li> </ul> <p>Green start-up:</p> <ul style="list-style-type: none"> <li>- Small-scale and flexible</li> <li>- Commercial</li> <li>- Relatively unproven</li> </ul> <p>Grid manager:</p> <ul style="list-style-type: none"> <li>- Non-commercial</li> <li>- Expertise</li> <li>- Unproven as service provider</li> </ul> <p>Energy cooperative:</p> <ul style="list-style-type: none"> <li>- Little in-house knowledge</li> <li>- Flexible</li> <li>- Self-determined objective and strategy</li> </ul> <p>Energy company:</p> <ul style="list-style-type: none"> <li>- Commercial</li> <li>- Knowledgeable, reliable</li> <li>- Inflexible</li> </ul> |

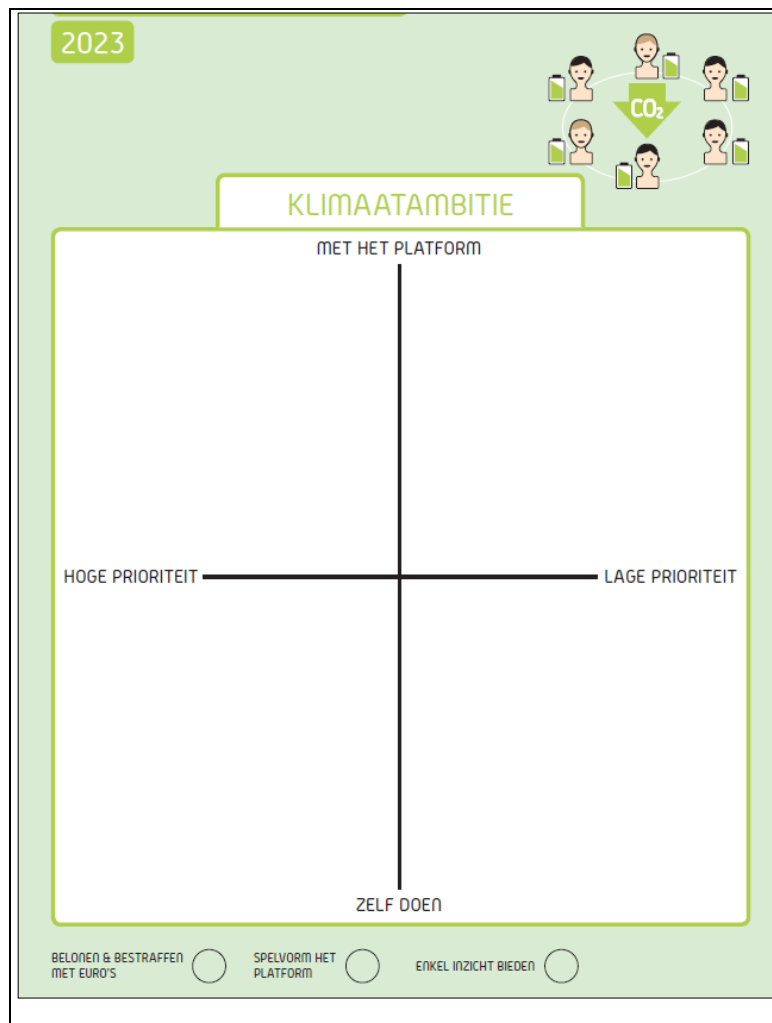

### Challenge 3: 'Operationalizing climate ambition' in the context of climate platforms

On the y-axis: 'with the platform' and 'do-it-yourself'

On the x-axis: 'high priority' and 'low-priority'

At the bottom:

- reward and punish with euro's
- gamification
- offering insight
